# Supplementary material
Source: PubMed Central journal article supplement (PMC7893610)

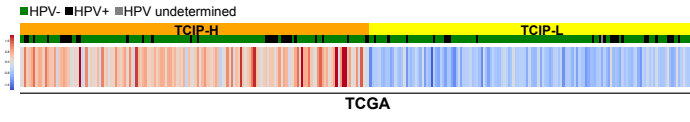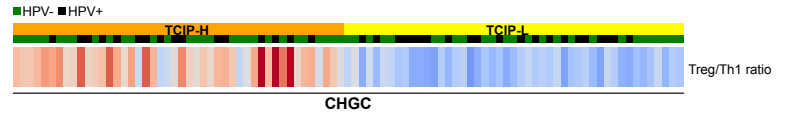

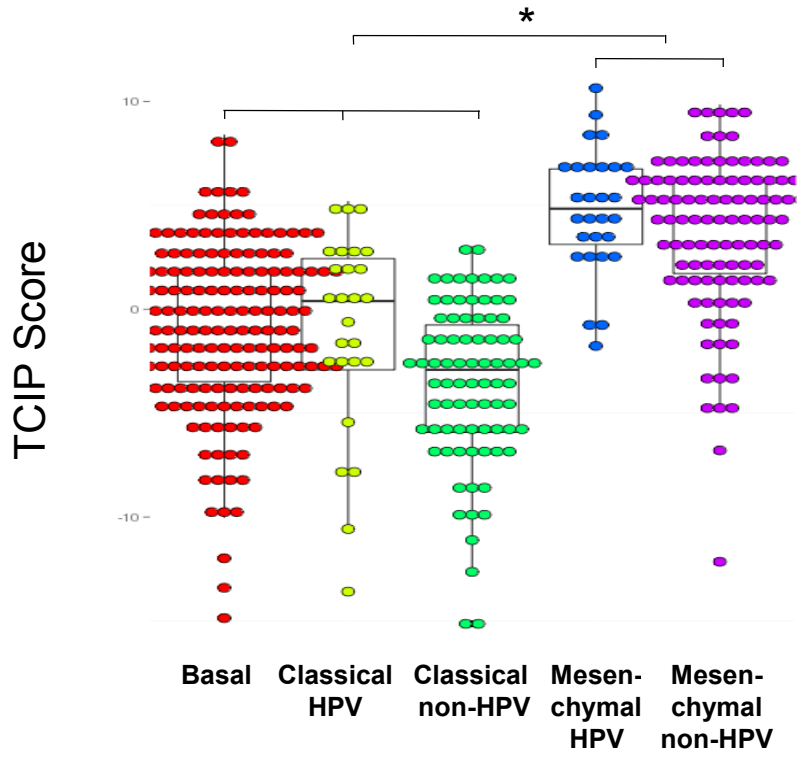

A

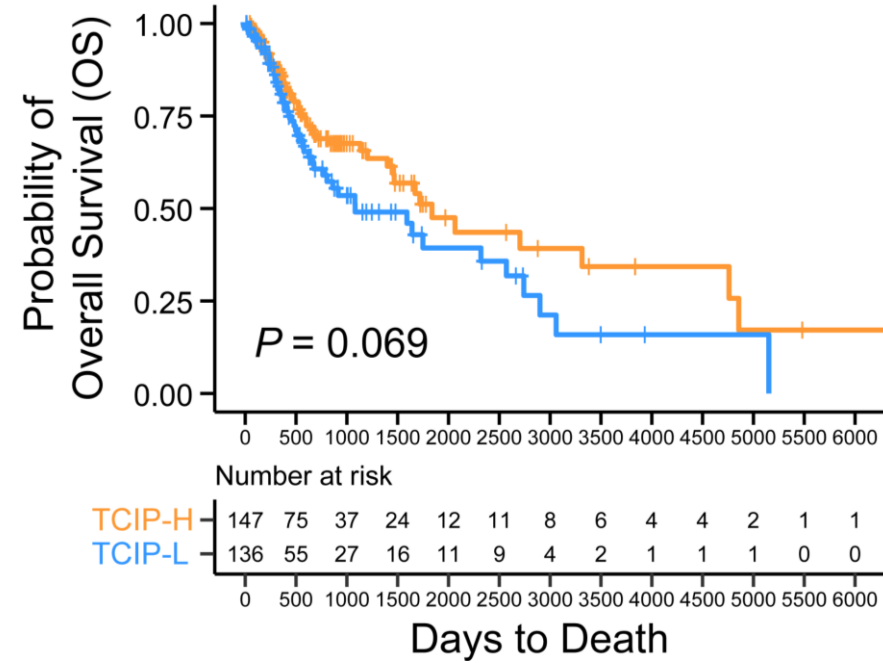

B

## Multivariate Cox Proportional-Hazards Analysis of Overall Survival

| Variable    | No. of Patients | Hazard Ratio | 95% CI low | 95% CI high | P-value |
|-------------|-----------------|--------------|------------|-------------|---------|
| TCIP        |                 |              |            |             |         |
| TCIP-L      | 136             | 1.39         | 0.93       | 2.07        | 0.11    |
| TCIP-H      | 147             | 1.00         |            |             |         |
| TNM stage   |                 |              |            |             |         |
| I,ii,iii    | 140             | 1.00         |            |             |         |
| iva,ivb,ivc | 143             | 1.06         | 0.71       | 1.60        | 0.77    |
| HPV         |                 |              |            |             |         |
| negative    | 228             | 1.00         |            |             |         |
| positive    | 55              | 0.61         | 0.33       | 1.14        | 0.12    |

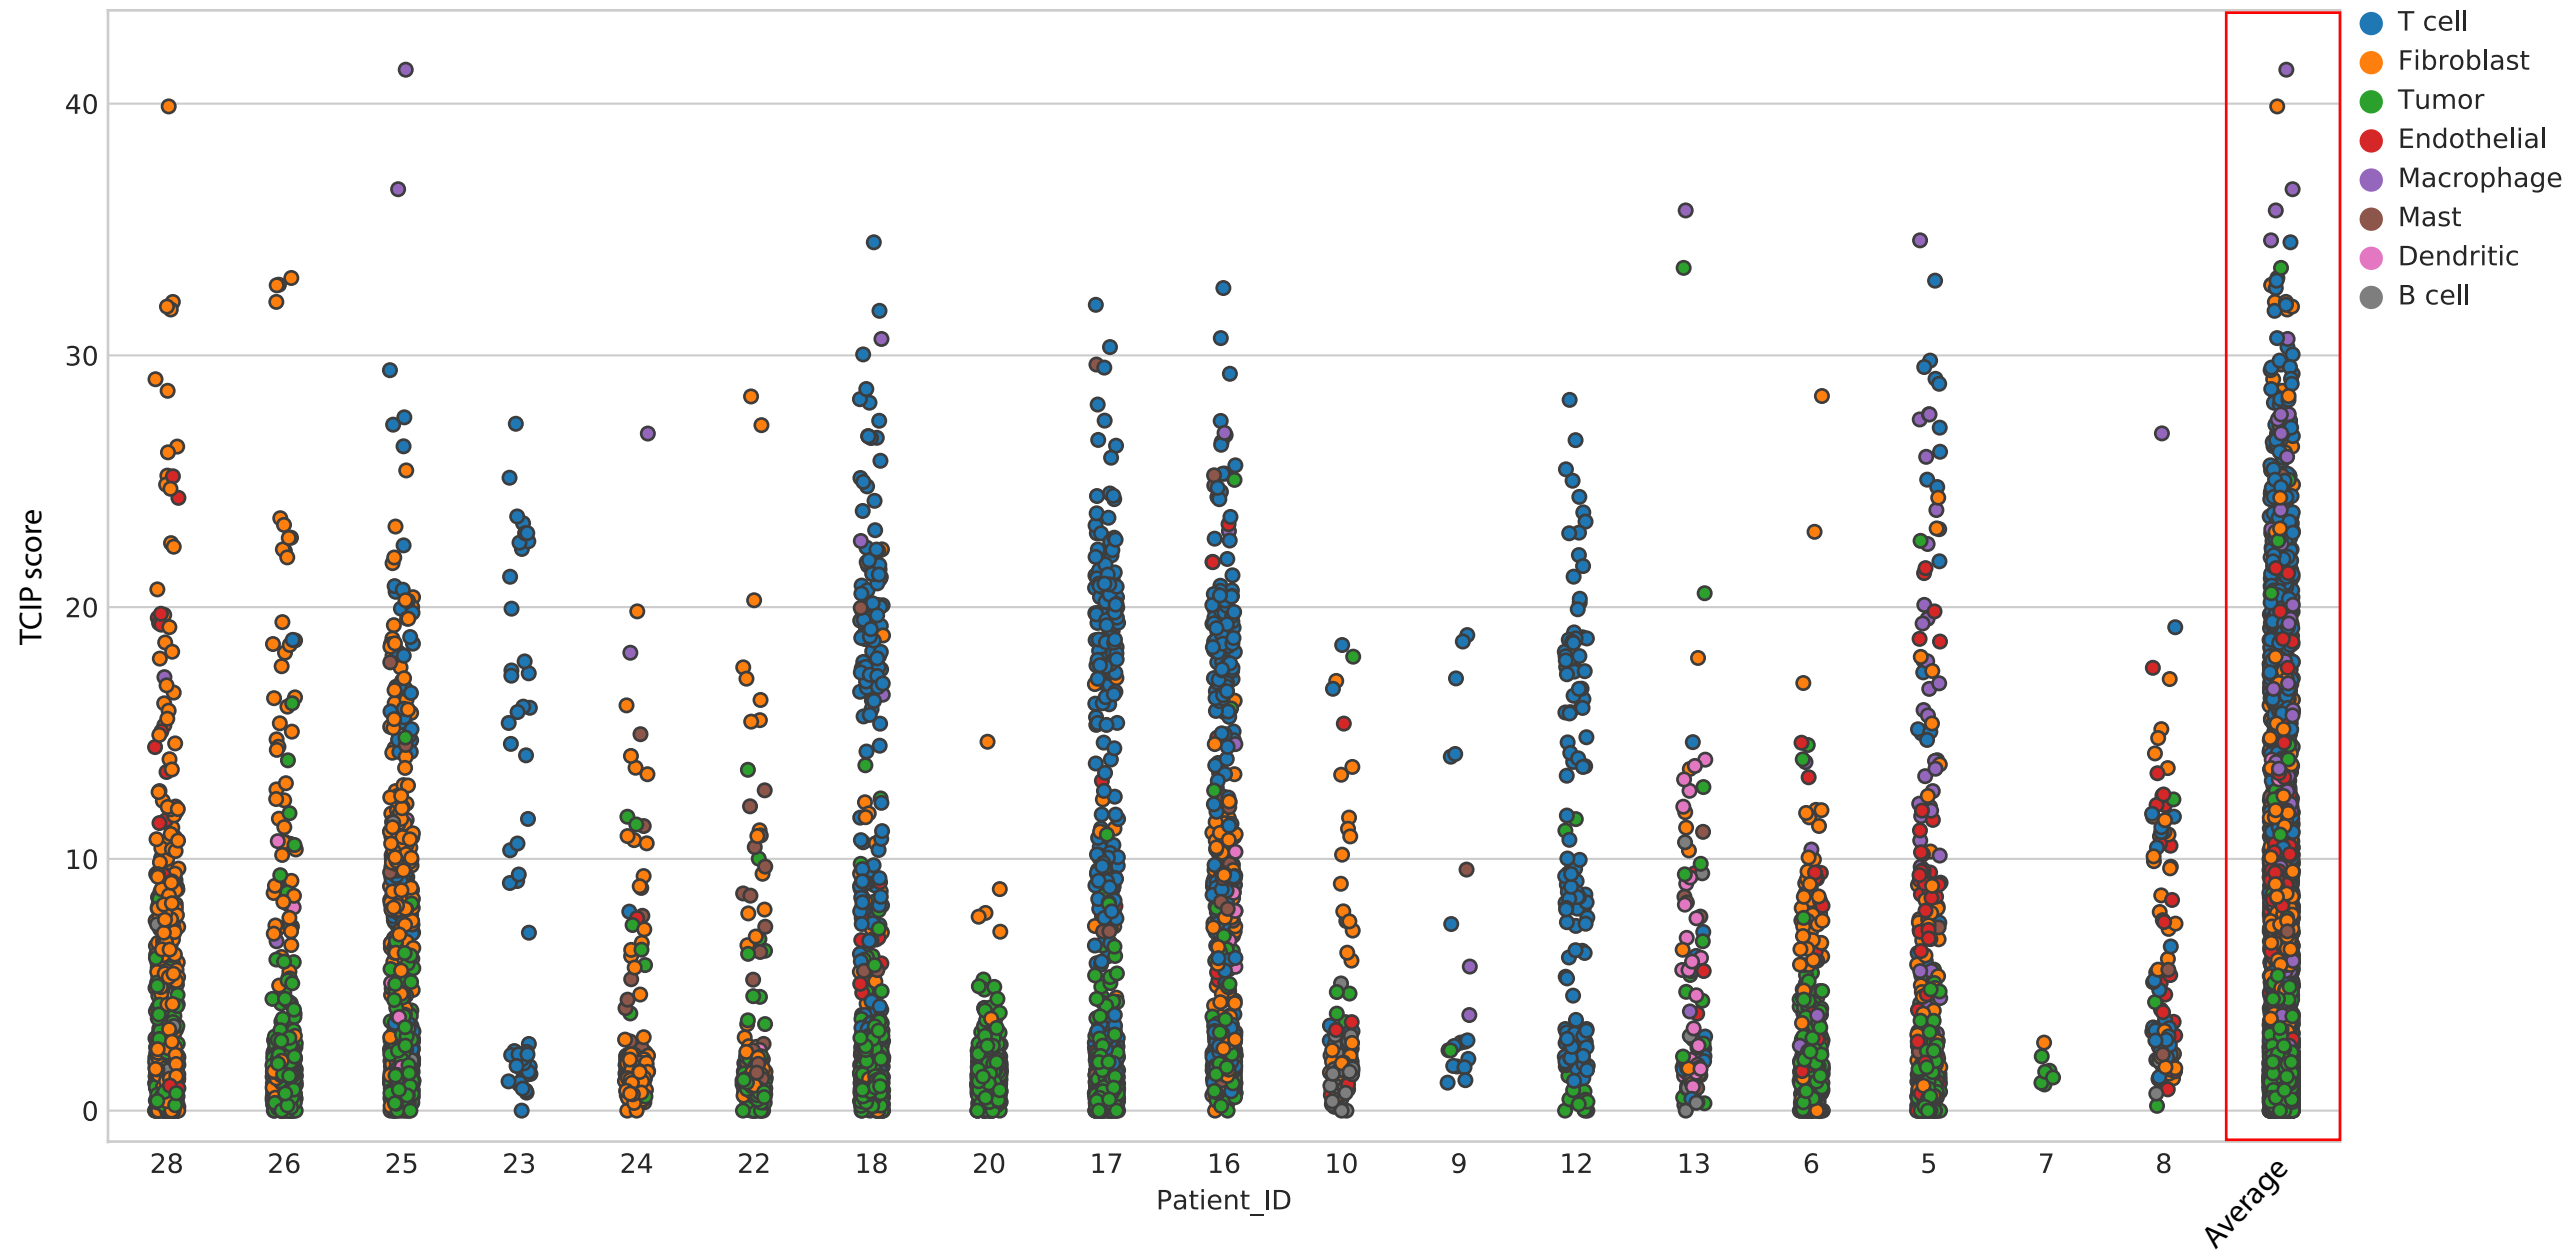

Supplement: NIHMS1661990-supplement-Supplementary_figures_pdf.pdf [file NIHMS1661990-supplement-Supplementary_figures_pdf.pdf]
